# Supplementary material for: Assessment of a deep-learning system for fracture detection in musculoskeletal radiographs
Source: PubMed Central journal article supplement (PMC7599208; doi:10.1038/s41746-020-00352-w), 2020-10-30
Supplement: 41746_2020_352_MOESM1_ESM.pdf [file 41746_2020_352_MOESM1_ESM.pdf]

## Supplementary Information

### *Supplementary Tables*

| <b>Fracture Types</b>           | <b>N obs.</b> | <b>N Fracture Cases</b> | <b>AUC</b> | <b>95% Bootstrap CI</b> |
|---------------------------------|---------------|-------------------------|------------|-------------------------|
| Images without Callus Formation | 11608         | 1535                    | 0.982      | (0.979, 0.985)          |
| Images without Displacement     | 10670         | 597                     | 0.971      | (0.964, 0.977)          |
| Images without Angulation       | 11511         | 1438                    | 0.979      | (0.975, 0.983)          |
| Images without Comminution      | 11434         | 1361                    | 0.978      | (0.973, 0.982)          |
| Images without Lucent Line      | 10292         | 219                     | 0.948      | (0.931, 0.963)          |

**Supplementary Table 1:** AUC of the deep-learning system on all 16,019 test radiographs stratified by fracture type.

| Anatomy        | Sensitivity |                 | Specificity |                 |
|----------------|-------------|-----------------|-------------|-----------------|
|                | Estimate    | 95% Wilson's CI | Estimate    | 95% Wilson's CI |
| ankle          | 0.981       | (0.946, 0.994)  | 0.873       | (0.848, 0.894)  |
| clavicle       | 0.897       | (0.859, 0.926)  | 0.905       | (0.875, 0.929)  |
| elbow          | 0.960       | (0.902, 0.984)  | 0.822       | (0.796, 0.845)  |
| femur          | 0.941       | (0.891, 0.968)  | 0.943       | (0.926, 0.957)  |
| finger         | 0.972       | (0.936, 0.988)  | 0.617       | (0.584, 0.65)   |
| foot           | 0.918       | (0.852, 0.956)  | 0.512       | (0.48, 0.545)   |
| forearm        | 0.980       | (0.95, 0.992)   | 0.914       | (0.892, 0.931)  |
| hand           | 0.947       | (0.895, 0.974)  | 0.669       | (0.637, 0.7)    |
| hip            | 0.920       | (0.85, 0.959)   | 0.946       | (0.929, 0.958)  |
| humerus        | 0.937       | (0.898, 0.961)  | 0.934       | (0.915, 0.95)   |
| knee           | 1.000       | (0.962, 1)      | 0.847       | (0.823, 0.868)  |
| lumbar spine   | 0.970       | (0.915, 0.99)   | 0.551       | (0.519, 0.582)  |
| pelvis         | 0.930       | (0.862, 0.966)  | 0.915       | (0.895, 0.932)  |
| shoulder       | 0.920       | (0.85, 0.959)   | 0.880       | (0.858, 0.899)  |
| tibia / fibula | 1.000       | (0.973, 1)      | 0.883       | (0.86, 0.903)   |
| wrist          | 0.990       | (0.963, 0.997)  | 0.867       | (0.842, 0.889)  |

**Supplementary Table 2:** Sensitivity and specificity of the deep-learning system on all 16,019 test radiographs.

| <b>Anatomy</b> | <b>View</b>          | <b>n</b> | <b>AUC</b> | <b>95% Bootstrap CI</b> |
|----------------|----------------------|----------|------------|-------------------------|
| ankle          | frontal              | 305      | 0.988      | (0.977, 0.996)          |
|                | lateral              | 367      | 0.989      | (0.972, 0.999)          |
|                | oblique-mortise      | 328      | 0.975      | (0.950, 0.991)          |
| clavicle       | frontal              | 774      | 0.962      | (0.948, 0.974)          |
| elbow          | frontal              | 626      | 0.971      | (0.952, 0.986)          |
|                | lateral              | 406      | 0.954      | (0.906, 0.986)          |
| femur          | frontal              | 543      | 0.993      | (0.987, 0.997)          |
|                | lateral              | 457      | 0.984      | (0.969, 0.994)          |
| finger         | frontal              | 394      | 0.952      | (0.907, 0.985)          |
|                | lateral              | 407      | 0.941      | (0.908, 0.969)          |
|                | oblique              | 199      | 0.964      | (0.920, 0.993)          |
| foot           | frontal-dorsoplantar | 350      | 0.896      | (0.838, 0.946)          |
|                | lateral              | 353      | 0.864      | (0.782, 0.931)          |
|                | oblique              | 297      | 0.901      | (0.838, 0.956)          |
| forearm        | frontal              | 474      | 0.984      | (0.963, 0.996)          |
|                | lateral              | 526      | 0.991      | (0.982, 0.997)          |
| hand           | frontal              | 307      | 0.987      | (0.967, 0.998)          |
|                | lateral              | 365      | 0.899      | (0.835, 0.959)          |
|                | oblique              | 328      | 0.973      | (0.945, 0.993)          |
| hip            | frog-leg             | 565      | 0.967      | (0.911, 0.998)          |
|                | frontal              | 471      | 0.987      | (0.975, 0.996)          |
| humerus        | frontal              | 509      | 0.988      | (0.978, 0.996)          |
|                | lateral              | 491      | 0.978      | (0.963, 0.989)          |
| knee           | frontal              | 532      | 0.995      | (0.992, 0.998)          |
|                | lateral              | 547      | 0.997      | (0.994, 1.000)          |
| lumbar spine   | frontal              | 360      | 0.971      | (0.938, 0.992)          |
|                | lateral              | 558      | 0.911      | (0.867, 0.951)          |
|                | oblique              | 131      | 0.991      | (0.976, 1.000)          |
| pelvis         | frontal-inlet-outlet | 1007     | 0.982      | (0.973, 0.989)          |
| shoulder       | axillary             | 65       | 0.993      | (0.970, 1.000)          |
|                | frontal              | 695      | 0.967      | (0.939, 0.989)          |
|                | y                    | 282      | 0.950      | (0.895, 0.987)          |
| tibia / fibula | frontal              | 502      | 0.994      | (0.989, 0.998)          |
|                | lateral              | 498      | 0.995      | (0.990, 0.999)          |
| wrist          | frontal              | 355      | 0.996      | (0.990, 0.999)          |
|                | lateral              | 364      | 0.993      | (0.986, 0.999)          |
|                | oblique              | 281      | 0.989      | (0.977, 0.997)          |

**Supplementary Table 3:** AUC of the deep-learning system on all 16,019 test radiographs, stratified by anatomical region and radiographic view.

| <b>Demographic / Clinical Characteristic</b> | <b>Level</b> | <b>n (%)</b>   |
|----------------------------------------------|--------------|----------------|
| Age Group                                    | 22- 44       | 4951 (30.9%)   |
|                                              | 45-64        | 5944 (37.1%)   |
|                                              | 65-74        | 2391 (14.9%)   |
|                                              | 75+          | 2733 (17.1%)   |
| Sex                                          | F            | 8991 (56.1%)   |
|                                              | M            | 7015 (43.8%)   |
|                                              | O            | 13 (0.1%)      |
| Cast                                         | Absent       | 15709 (98.1%)  |
|                                              | Present      | 310 (1.9%)     |
| Fixation Hardware                            | Absent       | 14674 (91.6%)  |
|                                              | Present      | 1345 (8.4%)    |
| Arthroplasty                                 | Absent       | 15363 (95.9%)  |
|                                              | Present      | 656 (4.1%)     |
| Confounding Finding <sup>1</sup>             | Absent       | 16,004 (99.9%) |
|                                              | Present      | 15 (0.1%)      |

**Supplementary Table 4:** Additional summary statistics of all 16,019 test radiographs.

<sup>1</sup> Confounding finding was defined as a medical or radiographic complication that renders a radiograph inconsistent with the typical presentation of pathology and/or impairs or significantly impacts the ability to make a confident diagnosis (e.g., obstructing jewelry, obstructing anatomy, or congenital deformities).

| Anatomy        | n     | Number of Expert Annotators Indicating Fracture |            |            |              | Adjudicated Reference Standard (Majority) |
|----------------|-------|-------------------------------------------------|------------|------------|--------------|-------------------------------------------|
|                |       | 0                                               | 1          | 2          | 3            | Fracture                                  |
| Overall        | 16019 | 12845 (80.2%)                                   | 759 (4.7%) | 506 (3.2%) | 1909 (11.9%) | 2415 (15.1%)                              |
| ankle          | 1000  | 756 (75.6%)                                     | 84 (8.4%)  | 33 (3.3%)  | 127 (12.7%)  | 160 (16.0%)                               |
| clavicle       | 774   | 384 (49.6%)                                     | 69 (8.9%)  | 39 (5.0%)  | 282 (36.4%)  | 321 (41.5%)                               |
| elbow          | 1032  | 864 (83.7%)                                     | 68 (6.6%)  | 32 (3.1%)  | 68 (6.6%)    | 100 (9.7%)                                |
| femur          | 1000  | 828 (82.8%)                                     | 20 (2.0%)  | 26 (2.6%)  | 126 (12.6%)  | 152 (15.2%)                               |
| finger         | 1000  | 760 (76.0%)                                     | 63 (6.3%)  | 52 (5.2%)  | 125 (12.5%)  | 177 (17.7%)                               |
| foot           | 1000  | 811 (81.1%)                                     | 79 (7.9%)  | 56 (5.6%)  | 54 (5.4%)    | 110 (11.0%)                               |
| forearm        | 1000  | 764 (76.4%)                                     | 37 (3.7%)  | 15 (1.5%)  | 184 (18.4%)  | 199 (19.9%)                               |
| hand           | 1000  | 814 (81.4%)                                     | 54 (5.4%)  | 41 (4.1%)  | 91 (9.1%)    | 132 (13.2%)                               |
| hip            | 1036  | 921 (88.9%)                                     | 15 (1.4%)  | 21 (2.0%)  | 79 (7.6%)    | 100 (9.7%)                                |
| humerus        | 1000  | 724 (72.4%)                                     | 39 (3.9%)  | 22 (2.2%)  | 215 (21.5%)  | 237 (23.7%)                               |
| knee           | 1079  | 964 (89.3%)                                     | 17 (1.6%)  | 24 (2.2%)  | 74 (6.9%)    | 98 (9.1%)                                 |
| lumbar spine   | 1049  | 911 (86.8%)                                     | 39 (3.7%)  | 31 (3.0%)  | 68 (6.5%)    | 99 (9.4%)                                 |
| pelvis         | 1007  | 863 (85.7%)                                     | 44 (4.4%)  | 29 (2.9%)  | 71 (7.1%)    | 100 (9.9%)                                |
| shoulder       | 1042  | 895 (85.9%)                                     | 47 (4.5%)  | 36 (3.5%)  | 64 (6.1%)    | 100 (9.6%)                                |
| tibia / fibula | 1000  | 828 (82.8%)                                     | 35 (3.5%)  | 17 (1.7%)  | 120 (12.0%)  | 137 (13.7%)                               |
| wrist          | 1000  | 758 (75.8%)                                     | 49 (4.9%)  | 32 (3.2%)  | 161 (16.1%)  | 193 (19.3%)                               |

**Supplementary Table 5:** Summary statistics of each anatomical region's reference standard on all 16,019 test radiographs.
